# Supplementary material
Source: HighWire-hosted journal article supplement (http://www.jneurosci.org/highwire/filestream/599802/field_highwire_adjunct_files/1/fig_2.pdf)

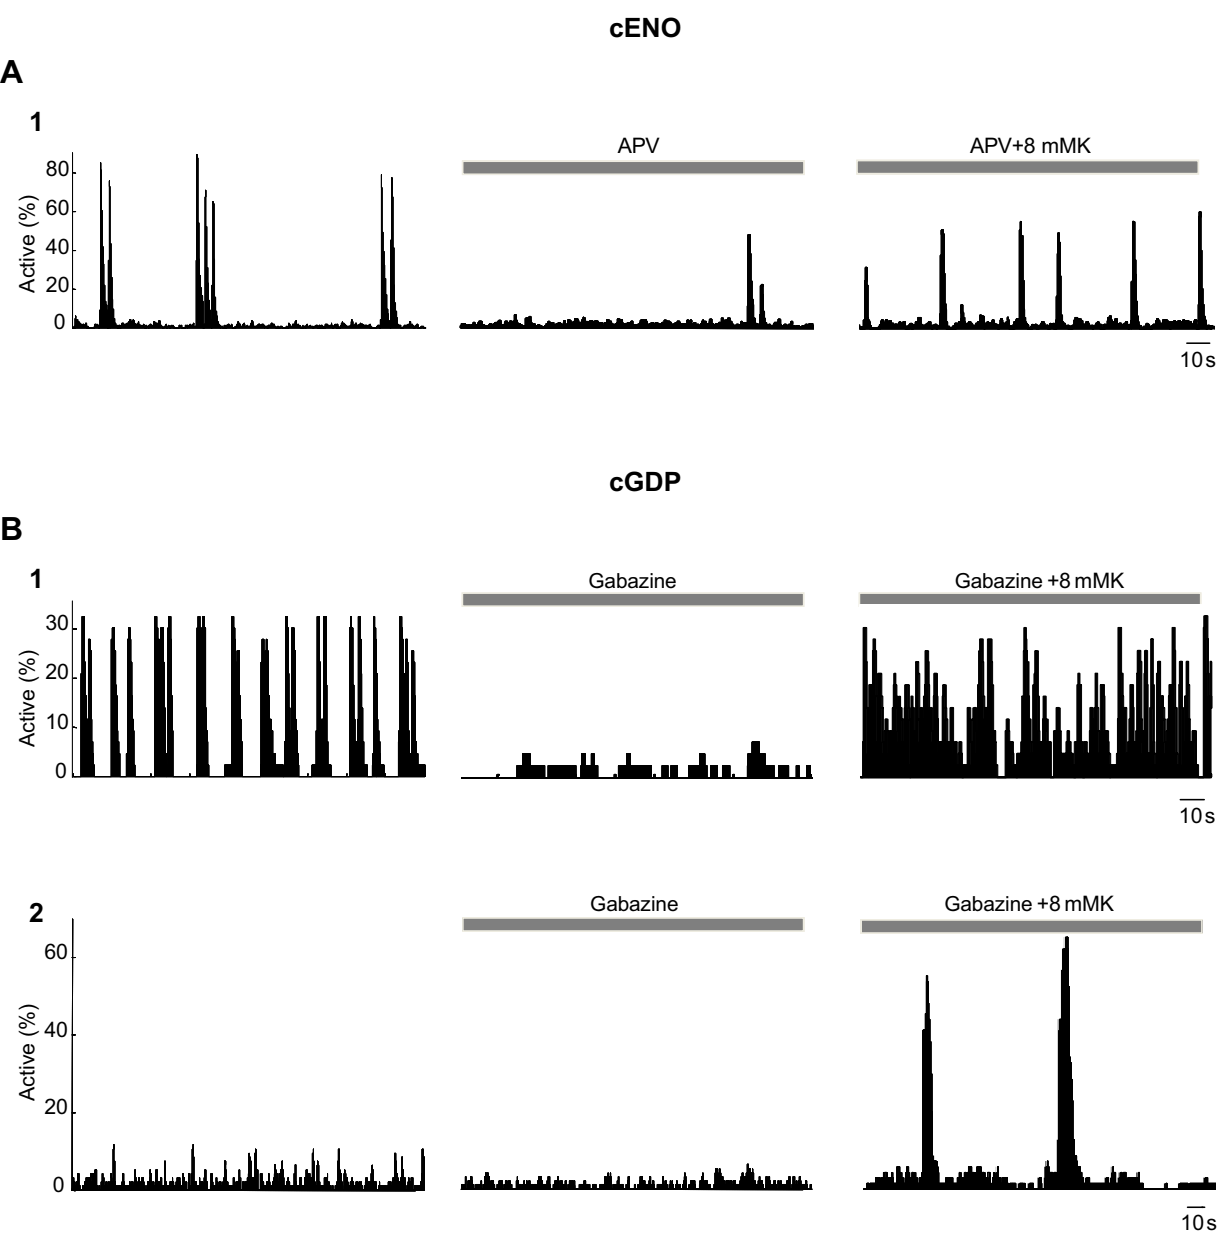

Supplement: fig_2.pdf [file fig_2.pdf]
